# Supplementary material
Source: PubMed Central journal article supplement (PMC6143018)

## Supplementary Online Content

Ostrom QT, Cote DJ, Ascha M, Kruchko C, Barnholtz-Sloan JS. Adult glioma incidence and survival by race or ethnicity in the United States from 2000 to 2014. *JAMA Oncol*. Published online June 21, 2018. doi: 10.1001/jamaoncol.2018.1789

**eTable 1.** Definitions of Glioma Histology Groups

**eTable 2.** Availability of Treatment Information for SEER Cases, by Histology Group and Race

**eTable 3.** Median Age at Diagnosis, Total Cases, Average Annual Age-Adjusted Incidence Rates (AAAIR), 95% Confidence Intervals (95% CI), and Incidence Rate Ratios (Males:Females) for Selected Glioma Histologies in Adults (ages 18+) by Race, Hispanic Ethnicity, and Sex, 2000-2014

**eTable 4.** Total Cases, Average Annual Age-Adjusted Incidence Rates (AAAIR), 95% Confidence Intervals (95% CI) for Selected Glioma Histologies in Adults (Ages 18+) by Race, Hispanic Ethnicity, and Age Groups, CBTRUS 2000-2014

**eTable 5.** One- and Five-Year Relative Survival Rates and 95% Confidence Intervals (95% CI) for Selected Glioma Histologies in Adults (Ages 18+) by Race, Ethnicity, and Age at Diagnosis, SEER 18 Registries, 2000-2014

**eTable 6.** Hazard Ratios, P Values, Median Survival and 95% Confidence Intervals for Individuals That Received Resection by Race and Ethnicity, Adjusted by Age at Diagnosis and Extent of Resection (Subtotal vs Gross Total), 2000-2014

**eTable 7.** One- and Five-Year Relative Survival Rates and 95% Confidence Intervals (95% CI) for Selected Glioma Histologies in Adults (Ages 18+) by Race, Ethnicity, and Treatment Groups, SEER 18 Registries, 2005-2014

**eTable 8.** One- and Five-Year Relative Survival Rates and 95% Confidence Intervals (95% CI) for Selected Glioma Histologies in Adults (Ages 18-64) by Race, Ethnicity, and Insurance Status, SEER 18 Registries, 2007-2014

**eTable 9.** Annual Percent Change (APC) and 95% Confidence Intervals by Glioma Histology and Race/Ethnicity, CBTRUS 2000-2014

**eFigure.** Average Annual Age-Adjusted Incidence Rates and 95% Confidence Intervals for Selected Glioma Histologies by Race, Ethnicity, and Age at Diagnosis, 2000-2014

This supplementary material has been provided by the authors to give readers additional information about their work.

**eTable 1.** Definitions of Glioma Histology Groups

| <b>Histology group</b>        | <b>CBTRUS histologies</b>                                                                             | <b>ICD-O-3 topography codes</b> | <b>ICD-O-3 Histology codes</b>                                       |
|-------------------------------|-------------------------------------------------------------------------------------------------------|---------------------------------|----------------------------------------------------------------------|
| Glioblastoma                  | Glioblastoma                                                                                          | C71, C72                        | 9440/3, 9441/3, 9442/3                                               |
| Non-glioblastoma astrocytomas | Pilocytic astrocytoma<br>Diffuse astrocytoma<br>Anaplastic astrocytoma<br>Unique astrocytoma variants | C71, C72                        | 9381/3, 9401/3, 9421/1,<br>9400/3, 9410/3, 9411/3,<br>9420/3, 9424/3 |
| Oligodendroglial tumors       | Oligodendroglioma<br>Anaplastic oligodendroglioma<br>Oligoastrocytic tumors                           | C71, C72                        | 9382/3, 9450/3, 9451/3,<br>9460/3                                    |
| Ependymoma                    | Ependymal tumors                                                                                      | C71, C72                        | 9391/3, 9392/3, 9393/3                                               |
| Other gliomas                 | Glioma malignant, NOS<br>Other neuroepithelial tumors                                                 | C71, C72                        | 9380/3, 9423/3, 9430/3,<br>9431/1, 9432/1                            |

**eTable 2.** Availability of Treatment Information for SEER Cases, by Histology Group and Race

| Group                        | Race/ethnicity     | Total cases | Complete extent of resection information |       | p-value | Complete radiation information |       | p-value               | Complete chemotherapy information |       | p-value                |
|------------------------------|--------------------|-------------|------------------------------------------|-------|---------|--------------------------------|-------|-----------------------|-----------------------------------|-------|------------------------|
|                              |                    |             |                                          |       |         |                                |       |                       |                                   |       |                        |
| Glioblastoma (all cases)     | Non-Hispanic white | 24,670      | 14,383                                   | 58.3% | 0.1066  | 18,438                         | 74.7% | 2.94x10 <sup>-b</sup> | 15,010                            | 60.8% | 2.70x10 <sup>-11</sup> |
|                              | API                | 1,335       | 749                                      | 56.1% |         | 999                            | 74.8% |                       | 824                               | 61.7% |                        |
|                              | Black              | 1,762       | 998                                      | 56.6% |         | 1,281                          | 72.7% |                       | 969                               | 55.0% |                        |
|                              | Hispanic white     | 2,977       | 1,709                                    | 57.4% |         | 2,095                          | 70.4% |                       | 1,656                             | 55.6% |                        |
| Non-glioblastoma astrocytoma | Non-Hispanic white | 7,664       | 3,937                                    | 51.4% | 0.0003  | 4,554                          | 59.4% | 0.0174                | 3,290                             | 42.9% | 1.66x10 <sup>-11</sup> |
|                              | API                | 543         | 232                                      | 42.7% |         | 306                            | 56.4% |                       | 235                               | 43.3% |                        |
|                              | Black              | 678         | 344                                      | 50.7% |         | 371                            | 54.7% |                       | 212                               | 31.3% |                        |
|                              | Hispanic white     | 1,272       | 683                                      | 53.7% |         | 710                            | 55.8% |                       | 450                               | 35.4% |                        |
| Oligodendroglial tumors      | Non-Hispanic white | 4,660       | 2,933                                    | 62.9% | 0.5473  | 2,252                          | 48.3% | 0.5440                | 1,972                             | 42.3% | 1.02x10 <sup>-5</sup>  |
|                              | API                | 454         | 291                                      | 64.1% |         | 232                            | 51.1% |                       | 215                               | 47.4% |                        |
|                              | Black              | 292         | 176                                      | 60.3% |         | 148                            | 50.7% |                       | 103                               | 35.3% |                        |
|                              | Hispanic white     | 910         | 563                                      | 61.9% |         | 437                            | 48.0% |                       | 318                               | 34.9% |                        |

**eTable 3.** Median Age at Diagnosis, Total Cases, Average Annual Age-Adjusted Incidence Rates (AAAIR), 95% Confidence Intervals (95% CI), and Incidence Rate Ratios (Males:Females) for Selected Glioma Histologies in Adults (ages 18+) by Race, Hispanic Ethnicity, and Sex, 2000-2014

| Histologic group              | Race/ethnicity     | Overall                 |         |                  | Males  |                  | Females |                  | Incidence Rate Ratio (Male:Females) |
|-------------------------------|--------------------|-------------------------|---------|------------------|--------|------------------|---------|------------------|-------------------------------------|
|                               |                    | Median Age at Diagnosis | Count   | AAAIR (95%CI)    | Count  | AAAIR (95%CI)    | Count   | AAAIR (95%CI)    |                                     |
| Glioblastoma                  | All groups         | 63                      | 150,631 | 4.23 (4.21-4.25) | 86,364 | 5.31 (5.27-5.35) | 64,267  | 3.33 (3.31-3.36) | 1.59**                              |
|                               | Non-Hispanic white | 64                      | 128,976 | 4.71 (4.69-4.74) | 74,128 | 5.87 (5.83-5.92) | 54,848  | 3.72 (3.68-3.75) | 1.58**                              |
|                               | Hispanic white     | 60                      | 9,217   | 3.34 (3.26-3.41) | 5,187  | 4.07 (3.95-4.20) | 4,030   | 2.73 (2.65-2.82) | 1.49**                              |
|                               | Black              | 59                      | 8,290   | 2.24 (2.19-2.29) | 4,634  | 2.89 (2.80-2.98) | 3,656   | 1.76 (1.70-1.82) | 1.64**                              |
|                               | AIAN               | 59                      | 525     | 1.88 (1.71-2.06) | 309    | 2.36 (2.07-2.68) | 216     | 1.48 (1.28-1.70) | 1.60**                              |
|                               | API                | 61                      | 2,929   | 2.00 (1.92-2.07) | 1,680  | 2.56 (2.43-2.69) | 1,249   | 1.55 (1.46-1.64) | 1.65**                              |
| Non-glioblastoma astrocytomas | All groups         | 48                      | 46,002  | 1.35 (1.33-1.36) | 25,439 | 1.56 (1.54-1.58) | 20,563  | 1.16 (1.14-1.17) | 1.35**                              |
|                               | Non-Hispanic white | 50                      | 37,351  | 1.55 (1.54-1.57) | 20,801 | 1.79 (1.77-1.82) | 16,550  | 1.33 (1.31-1.35) | 1.35**                              |
|                               | Hispanic white     | 41                      | 3,770   | 1.02 (0.99-1.06) | 2,054  | 1.13 (1.07-1.18) | 1,716   | 0.93 (0.88-0.97) | 1.22**                              |
|                               | Black              | 44                      | 3,026   | 0.74 (0.72-0.77) | 1,569  | 0.84 (0.80-0.89) | 1,457   | 0.66 (0.63-0.69) | 1.28**                              |
|                               | AIAN               | 41                      | 286     | 0.78 (0.68-0.88) | 143    | 0.81 (0.67-0.98) | 143     | 0.75 (0.63-0.89) | 1.08                                |
|                               | API                | 41                      | 1,289   | 0.76 (0.72-0.81) | 694    | 0.89 (0.82-0.96) | 595     | 0.66 (0.61-0.72) | 1.35**                              |
| Oligodendroglial tumors       | All groups         | 43                      | 26,068  | 0.78 (0.77-0.79) | 14,596 | 0.89 (0.88-0.90) | 11,472  | 0.67 (0.66-0.68) | 1.33**                              |
|                               | Non-Hispanic white | 44                      | 21,016  | 0.92 (0.91-0.93) | 11,856 | 1.05 (1.04-1.07) | 9,160   | 0.79 (0.78-0.81) | 1.33**                              |
|                               | Hispanic white     | 41                      | 2,341   | 0.59 (0.57-0.62) | 1,262  | 0.64 (0.60-0.68) | 1,079   | 0.55 (0.52-0.58) | 1.17**                              |
|                               | Black              | 43                      | 1,374   | 0.33 (0.31-0.35) | 729    | 0.38 (0.35-0.41) | 645     | 0.29 (0.27-0.32) | 1.29**                              |
|                               | AIAN               | 36                      | 155     | 0.38 (0.32-0.45) | 88     | 0.44 (0.35-0.55) | 67      | 0.33 (0.26-0.42) | 1.33                                |
|                               | API                | 41                      | 957     | 0.53 (0.50-0.57) | 515    | 0.61 (0.56-0.67) | 442     | 0.47 (0.42-0.51) | 1.31**                              |
| Ependymoma                    | All groups         | 47                      | 8,816   | 0.26 (0.25-0.26) | 4,525  | 0.27 (0.26-0.28) | 4,291   | 0.25 (0.24-0.25) | 1.11**                              |
|                               | Non-Hispanic white | 48                      | 6,804   | 0.29 (0.28-0.29) | 3,548  | 0.30 (0.29-0.31) | 3,256   | 0.27 (0.26-0.28) | 1.11**                              |
|                               | Hispanic white     | 41                      | 896     | 0.23 (0.21-0.25) | 450    | 0.24 (0.22-0.27) | 446     | 0.22 (0.20-0.25) | 1.08                                |
|                               | Black              | 44                      | 683     | 0.16 (0.15-0.18) | 317    | 0.16 (0.15-0.18) | 366     | 0.16 (0.15-0.18) | 1.02                                |
|                               | AIAN               | 38                      | 50      | 0.13 (0.09-0.17) | 24     | 0.13 (0.08-0.20) | 26      | 0.13 (0.09-0.20) | 0.96                                |
|                               | API                | 42                      | 340     | 0.19 (0.17-0.22) | 161    | 0.19 (0.16-0.23) | 179     | 0.19 (0.17-0.23) | 0.99                                |
| Other gliomas                 | All groups         | 56                      | 13,291  | 0.39 (0.38-0.39) | 6,809  | 0.43 (0.42-0.44) | 6,482   | 0.35 (0.34-0.36) | 1.24**                              |
|                               | Non-Hispanic white | 59                      | 10,433  | 0.42 (0.41-0.42) | 5,343  | 0.46 (0.45-0.48) | 5,090   | 0.37 (0.36-0.39) | 1.24**                              |
|                               | Hispanic white     | 47                      | 1,097   | 0.34 (0.32-0.36) | 588    | 0.39 (0.36-0.43) | 509     | 0.30 (0.27-0.33) | 1.32**                              |
|                               | Black              | 50                      | 1,193   | 0.31 (0.30-0.33) | 581    | 0.36 (0.33-0.39) | 612     | 0.29 (0.26-0.31) | 1.25**                              |
|                               | AIAN               | 50                      | 54      | 0.17 (0.13-0.23) | 28     | 0.15 (0.10-0.23) | 26      | 0.18 (0.11-0.26) | 0.87                                |
|                               | API                | 49                      | 432     | 0.28 (0.26-0.31) | 222    | 0.31 (0.27-0.36) | 210     | 0.26 (0.22-0.29) | 1.23*                               |

Abbreviations: 95% CI: 95% confidence interval; Average annual age-adjusted incidence rate; AIAN: American Indian/Alaska Native, API: Asian Pacific Islander

-- Counts and rates are not presented when fewer than 16 cases were reported for the specific category

\* Incidence rate ratio is significant different from 1 at p<0.05

\*\* Incidence rate ratio is significant different from 1 at p<0.005

**eTable 4.** Total Cases, Average Annual Age-Adjusted Incidence Rates (AAAIR), 95% Confidence Intervals (95% CI) for Selected Glioma Histologies in Adults (Ages 18+) by Race, Hispanic Ethnicity, and Age Groups, CBTRUS 2000-2014

| Histologic group              | Race/ ethnicity    | 18-34  |                  | 35-44 |                  | 45-54  |                  | 55-64  |                  | 65-74  |                     | 75+    |                     |
|-------------------------------|--------------------|--------|------------------|-------|------------------|--------|------------------|--------|------------------|--------|---------------------|--------|---------------------|
|                               |                    | Count  | AAAIR (95%CI)    | Count | AAAIR (95%CI)    | Count  | AAAIR (95%CI)    | Count  | AAAIR (95%CI)    | Count  | AAAIR (95%CI)       | Count  | AAAIR (95%CI)       |
| Glioblastoma                  | All groups         | 4,052  | 0.39 (0.38-0.40) | 7,915 | 1.23 (1.21-1.26) | 23,563 | 3.63 (3.59-3.68) | 39,578 | 8.07 (7.99-8.15) | 40,072 | 12.98 (12.86-13.11) | 35,451 | 13.24 (13.10-13.38) |
|                               | Non-Hispanic white | 2,825  | 0.45 (0.44-0.47) | 6,049 | 1.43 (1.40-1.47) | 19,401 | 4.17 (4.11-4.23) | 33,821 | 9.04 (8.94-9.13) | 35,008 | 14.32 (14.17-14.47) | 31,872 | 14.30 (14.14-14.46) |
|                               | Hispanic white     | 544    | 0.30 (0.27-0.32) | 860   | 0.96 (0.90-1.03) | 1,749  | 2.71 (2.58-2.84) | 2,351  | 6.20 (5.95-6.46) | 2,140  | 10.31 (9.88-10.76)  | 1,573  | 10.98 (10.45-11.54) |
|                               | Black              | 398    | 0.26 (0.24-0.29) | 624   | 0.73 (0.68-0.79) | 1,707  | 2.15 (2.05-2.26) | 2,342  | 4.46 (4.28-4.64) | 1,942  | 6.62 (6.32-6.92)    | 1,277  | 6.11 (5.78-6.46)    |
|                               | AIAN               | 35     | 0.24 (0.17-0.33) | 49    | 0.61 (0.45-0.81) | 96     | 1.37 (1.11-1.67) | 139    | 3.16 (2.65-3.73) | 122    | 5.75 (4.76-6.88)    | 84     | 6.67 (5.31-8.26)    |
|                               | API                | 208    | 0.31 (0.27-0.36) | 278   | 0.74 (0.66-0.83) | 478    | 1.52 (1.39-1.66) | 726    | 3.38 (3.14-3.64) | 681    | 5.66 (5.24-6.10)    | 558    | 6.88 (6.32-7.47)    |
| Non-glioblastoma astrocytomas | All groups         | 11,088 | 1.06 (1.04-1.08) | 7,401 | 1.16 (1.13-1.19) | 7,800  | 1.22 (1.19-1.25) | 7,672  | 1.56 (1.53-1.60) | 6,680  | 2.16 (2.11-2.21)    | 5,361  | 2.01 (1.96-2.07)    |
|                               | Non-Hispanic white | 8,288  | 1.32 (1.29-1.35) | 5,684 | 1.37 (1.34-1.41) | 6,305  | 1.38 (1.35-1.42) | 6,517  | 1.74 (1.70-1.79) | 5,784  | 2.36 (2.30-2.42)    | 4,773  | 2.16 (2.09-2.22)    |
|                               | Hispanic white     | 1,265  | 0.69 (0.65-0.73) | 768   | 0.84 (0.78-0.90) | 641    | 0.98 (0.91-1.06) | 479    | 1.26 (1.15-1.37) | 382    | 1.84 (1.66-2.03)    | 235    | 1.63 (1.43-1.86)    |
|                               | Black              | 924    | 0.60 (0.56-0.64) | 559   | 0.66 (0.60-0.71) | 560    | 0.71 (0.65-0.77) | 429    | 0.82 (0.74-0.90) | 344    | 1.17 (1.05-1.31)    | 210    | 1.00 (0.87-1.15)    |
|                               | AIAN               | 95     | 0.61 (0.49-0.74) | 58    | 0.73 (0.55-0.94) | 47     | 0.66 (0.48-0.88) | 47     | 1.06 (0.78-1.41) | 25     | 1.10 (0.70-1.63)    | --     | --                  |
|                               | API                | 426    | 0.64 (0.58-0.70) | 268   | 0.70 (0.62-0.79) | 200    | 0.64 (0.56-0.74) | 164    | 0.76 (0.65-0.88) | 114    | 0.95 (0.78-1.14)    | 117    | 1.45 (1.20-1.74)    |
| Oligodendroglial tumors       | All groups         | 6,704  | 0.64 (0.63-0.66) | 6,606 | 1.04 (1.01-1.06) | 5,716  | 0.90 (0.87-0.92) | 3,965  | 0.81 (0.78-0.84) | 2,007  | 0.64 (0.61-0.67)    | 1,070  | 0.41 (0.38-0.43)    |
|                               | Non-Hispanic white | 5,230  | 0.84 (0.81-0.86) | 5,156 | 1.24 (1.21-1.28) | 4,617  | 1.02 (0.99-1.05) | 3,360  | 0.90 (0.87-0.93) | 1,721  | 0.70 (0.66-0.73)    | 932    | 0.43 (0.40-0.45)    |
|                               | Hispanic white     | 694    | 0.38 (0.35-0.41) | 685   | 0.75 (0.69-0.81) | 515    | 0.79 (0.72-0.86) | 268    | 0.70 (0.62-0.79) | 111    | 0.53 (0.43-0.64)    | 68     | 0.47 (0.36-0.59)    |
|                               | Black              | 347    | 0.23 (0.21-0.26) | 378   | 0.45 (0.40-0.49) | 302    | 0.38 (0.34-0.43) | 198    | 0.37 (0.32-0.43) | 109    | 0.36 (0.30-0.44)    | 40     | 0.19 (0.14-0.26)    |
|                               | AIAN               | 69     | 0.47 (0.36-0.59) | 35    | 0.43 (0.30-0.60) | 27     | 0.38 (0.25-0.56) | 18     | 0.39 (0.23-0.62) | --     | --                  | --     | --                  |
|                               | API                | 295    | 0.43 (0.39-0.49) | 279   | 0.74 (0.65-0.83) | 206    | 0.66 (0.57-0.76) | 102    | 0.48 (0.39-0.58) | 49     | 0.40 (0.30-0.53)    | 26     | 0.32 (0.21-0.47)    |
| Ependymoma                    | All groups         | 1,982  | 0.19 (0.18-0.20) | 1,696 | 0.27 (0.25-0.28) | 2,061  | 0.32 (0.31-0.34) | 1,605  | 0.33 (0.31-0.34) | 975    | 0.31 (0.29-0.33)    | 497    | 0.19 (0.17-0.21)    |
|                               | Non-Hispanic white | 1,367  | 0.22 (0.21-0.23) | 1,236 | 0.30 (0.28-0.31) | 1,605  | 0.35 (0.33-0.37) | 1,333  | 0.36 (0.34-0.38) | 821    | 0.33 (0.31-0.36)    | 442    | 0.20 (0.18-0.22)    |
|                               | Hispanic white     | 300    | 0.16 (0.15-0.18) | 203   | 0.22 (0.19-0.26) | 190    | 0.29 (0.25-0.34) | 104    | 0.27 (0.22-0.33) | 78     | 0.38 (0.30-0.47)    | 21     | 0.15 (0.09-0.22)    |
|                               | Black              | 178    | 0.12 (0.10-0.13) | 158   | 0.19 (0.16-0.22) | 172    | 0.22 (0.19-0.25) | 110    | 0.21 (0.17-0.25) | 49     | 0.17 (0.12-0.22)    | 16     | 0.08 (0.04-0.12)    |
|                               | AIAN               | 20     | 0.13 (0.08-0.21) | --    | --               | --     | --               | --     | --               | --     | --                  | --     | --                  |
|                               | API                | 104    | 0.15 (0.13-0.19) | 78    | 0.21 (0.16-0.26) | 71     | 0.23 (0.18-0.29) | 50     | 0.23 (0.17-0.31) | 21     | 0.17 (0.11-0.26)    | 16     | 0.19 (0.11-0.31)    |
| Other gliomas                 | All groups         | 2,468  | 0.24 (0.23-0.24) | 1,567 | 0.25 (0.23-0.26) | 1,879  | 0.29 (0.28-0.31) | 1,829  | 0.37 (0.36-0.39) | 1,907  | 0.62 (0.59-0.65)    | 3,641  | 1.32 (1.28-1.37)    |
|                               | Non-Hispanic white | 1,728  | 0.27 (0.26-0.29) | 1,112 | 0.27 (0.25-0.28) | 1,412  | 0.31 (0.29-0.32) | 1,435  | 0.38 (0.36-0.40) | 1,561  | 0.64 (0.61-0.68)    | 3,185  | 1.38 (1.33-1.43)    |
|                               | Hispanic white     | 317    | 0.17 (0.16-0.19) | 168   | 0.18 (0.16-0.21) | 174    | 0.27 (0.23-0.31) | 148    | 0.39 (0.33-0.46) | 118    | 0.57 (0.47-0.69)    | 172    | 1.23 (1.05-1.43)    |
|                               | Black              | 286    | 0.19 (0.16-0.21) | 187   | 0.22 (0.19-0.25) | 201    | 0.25 (0.22-0.29) | 171    | 0.32 (0.28-0.38) | 148    | 0.51 (0.43-0.60)    | 200    | 0.95 (0.83-1.09)    |
|                               | AIAN               | --     | --               | --    | --               | --     | --               | --     | --               | --     | --                  | --     | --                  |
|                               | API                | 99     | 0.15 (0.12-0.18) | 74    | 0.20 (0.16-0.25) | 72     | 0.23 (0.18-0.30) | 52     | 0.24 (0.18-0.32) | 63     | 0.54 (0.41-0.69)    | 72     | 0.91 (0.71-1.14)    |

Abbreviations: b95% CI: 95% confidence interval; AAAIR: Average annual age-adjusted incidence rate; AIAN: American Indian/Alaska Native, API: Asian Pacific Islander  
 -- Counts and rates are not presented when fewer than 16 cases were reported for the specific category

**eTable 5.** One- and Five-Year Relative Survival Rates and 95% Confidence Intervals (95% CI) for Selected Glioma Histologies in Adults (Ages 18+) by Race, Ethnicity, and Age at Diagnosis, SEER 18 Registries, 2000-2014

| Histologic group              | Race/ethnicity     | 18-34 |                             |                             | 35-44 |                             |                             | 45-54 |                             |                             | 55-64 |                             |                             | 65-74 |                             |                             | 75+   |                             |                             |
|-------------------------------|--------------------|-------|-----------------------------|-----------------------------|-------|-----------------------------|-----------------------------|-------|-----------------------------|-----------------------------|-------|-----------------------------|-----------------------------|-------|-----------------------------|-----------------------------|-------|-----------------------------|-----------------------------|
|                               |                    | N     | 1- year survival % (95% CI) | 5- year survival % (95% CI) | N     | 1- year survival % (95% CI) | 5- year survival % (95% CI) | N     | 1- year survival % (95% CI) | 5- year survival % (95% CI) | N     | 1- year survival % (95% CI) | 5- year survival % (95% CI) | N     | 1- year survival % (95% CI) | 5- year survival % (95% CI) | N     | 1- year survival % (95% CI) | 5- year survival % (95% CI) |
| Glioblastoma                  | All groups         | 1,012 | 76.4 (73.6-79.0)            | 26.1 (23.0-29.2)            | 2,028 | 68.0 (65.8-70.0)            | 15.2 (13.5-17.0)            | 5,795 | 58.0 (56.7-59.3)            | 7.4 (6.6-8.2)               | 8,968 | 46.5 (45.5-47.6)            | 4.4 (3.9-5.0)               | 7,868 | 29.7 (28.6-30.7)            | 2.3 (1.9-2.8)               | 5,209 | 14.0 (13.0-15.0)            | 1.0 (0.7-1.4)               |
|                               | Non-Hispanic white | 623   | 78.6 (75.1-81.7)            | 27.0 (23.1-31.0)            | 1,428 | 68.3 (65.8-70.7)            | 14.5 (12.5-16.6)            | 4,429 | 58.5 (57.0-60.0)            | 6.7 (5.9-7.6)               | 7,266 | 47.0 (45.8-48.2)            | 4.1 (3.6-4.7)               | 6,434 | 29.6 (28.4-30.7)            | 2.2 (1.8-2.7)               | 4,455 | 13.8 (12.8-14.9)            | 0.9 (0.6-1.4)               |
|                               | Hispanic white     | 192   | 72.6 (65.2-78.6)            | 23.4 (16.6-30.9)            | 312   | 69.6 (63.9-74.5)            | 19.3 (14.5-24.7)            | 651   | 53.6 (49.5-57.6)            | 9.4 (6.9-12.4)              | 760   | 44.5 (40.8-48.2)            | 5.6 (3.7-7.9)               | 680   | 26.8 (23.3-30.3)            | 2.5 (1.3-4.4)               | 377   | 12.7 (9.3-16.5)             | 0.8 (0.2-2.5)               |
|                               | Black              | 82    | 69.8 (58.4-78.7)            | 25.7 (15.7-36.8)            | 152   | 65.1 (56.8-72.2)            | 14.9 (8.9-22.2)             | 416   | 54.1 (49.0-58.8)            | 8.9 (6.0-12.6)              | 538   | 40.6 (36.2-44.9)            | 4.8 (2.9-7.5)               | 384   | 28.6 (24.0-33.4)            | 0.9 (0.1-4.3)               | 186   | 13.7 (9.0-19.3)             | 1.1 (0.1-5.0)               |
|                               | API                | 100   | 77.8 (68.0-85.0)            | 23.1 (13.9-33.6)            | 115   | 63.2 (53.3-71.6)            | 12.0 (5.8-20.7)             | 257   | 64.0 (57.6-69.7)            | 12.4 (8.1-17.7)             | 352   | 52.3 (46.7-57.7)            | 7.3 (4.2-11.5)              | 332   | 39.4 (33.8-44.9)            | 4.5 (2.0-8.7)               | 175   | 20.8 (14.8-27.5)            | 2.6 (0.7-7.0)               |
| Non-glioblastoma astrocytomas | All groups         | 2,798 | 95.0 (94.1-95.8)            | 73.6 (71.6-75.4)            | 1,862 | 90.0 (88.5-91.3)            | 62.9 (60.4-65.3)            | 1,856 | 77.3 (75.2-79.2)            | 41.4 (38.8-43.9)            | 1,661 | 57.2 (54.7-59.6)            | 20.7 (18.5-23.0)            | 1,216 | 40.7 (37.8-43.5)            | 12.5 (10.3-14.8)            | 866   | 24.1 (21.1-27.2)            | 4.5 (2.8-6.8)               |
|                               | Non-Hispanic white | 1,927 | 96.2 (95.2-97.0)            | 74.7 (72.4-76.8)            | 1,289 | 90.4 (88.6-91.9)            | 64.4 (61.5-67.3)            | 1,405 | 77.9 (75.6-80.1)            | 41.6 (38.7-44.5)            | 1,322 | 58.3 (55.5-61.0)            | 20.9 (18.4-23.4)            | 981   | 40.3 (37.1-43.5)            | 12.5 (10.1-15.1)            | 724   | 22.8 (19.7-26.1)            | 3.1 (1.6-5.4)               |
|                               | Hispanic white     | 444   | 92.2 (89.1-94.5)            | 70.8 (65.5-75.5)            | 271   | 90.1 (85.7-93.2)            | 61.4 (54.2-67.7)            | 218   | 71.8 (65.0-77.5)            | 42.0 (34.3-49.5)            | 167   | 57.3 (49.1-64.7)            | 28.2 (20.5-36.4)            | 113   | 43.3 (33.7-52.5)            | 17.2 (9.8-26.4)             | --    | --                          | --                          |
|                               | Black              | 228   | 91.0 (86.2-94.1)            | 71.4 (64.2-77.4)            | 140   | 86.8 (79.8-91.6)            | 61.9 (52.2-70.1)            | 122   | 69.8 (60.5-77.3)            | 32.3 (23.4-41.5)            | 88    | 43.4 (32.6-53.6)            | --                          | 64    | 38.3 (26.1-50.4)            | --                          | --    | --                          | --                          |
|                               | API                | 149   | 94.2 (88.7-97.1)            | 70.1 (60.3-77.9)            | 131   | 89.5 (82.6-93.8)            | 49.0 (38.5-58.8)            | 94    | 87.6 (78.6-93.0)            | 45.9 (33.3-57.5)            | 71    | 54.4 (41.7-65.4)            | ----                        | --    | --                          | --                          | 46    | 40.2 (24.7-55.2)            | 9.0 (1.7-24.1)              |
| Oligodendroglioma tumors      | All groups         | 1,708 | 97.4 (96.5-98.1)            | 80.8 (78.5-82.8)            | 1,664 | 97.1 (96.1-97.8)            | 79.8 (77.5-81.9)            | 1,493 | 92.1 (90.5-93.4)            | 72.5 (69.9-75.0)            | 922   | 81.9 (79.1-84.3)            | 53.2 (49.4-56.8)            | 425   | 68.1 (63.2-72.5)            | 33.7 (28.4-39.1)            | 184   | 44.3 (36.5-51.8)            | 24.2 (16.8-32.5)            |
|                               | Non-Hispanic white | 1,187 | 98.3 (97.3-98.9)            | 81.9 (79.2-84.2)            | 1,172 | 97.2 (96.0-98.0)            | 81.0 (78.3-83.4)            | 1,089 | 92.7 (90.9-94.1)            | 73.2 (70.1-76.1)            | 722   | 81.2 (78.1-84.0)            | 52.1 (47.8-56.2)            | 334   | 68.0 (62.4-72.9)            | 32.7 (26.7-38.7)            | 143   | 43.1 (34.3-51.6)            | 23.4 (15.3-32.5)            |
|                               | Hispanic white     | 268   | 95.7 (92.3-97.6)            | 80.0 (73.7-84.9)            | 265   | 96.5 (93.2-98.2)            | 77.8 (71.2-83.1)            | 207   | 91.6 (86.6-94.8)            | 77.8 (70.4-83.6)            | 98    | 80.6 (70.5-87.5)            | 60.1 (47.8-70.3)            | --    | --                          | --                          | --    | --                          | --                          |
|                               | Black              | 80    | 94.9 (86.7-98.1)            | 74.4 (61.4-83.6)            | 72    | 98.7 (89.5-99.8)            | 77.3 (63.8-86.3)            | 71    | 85.7 (74.4-92.2)            | 61.9 (47.1-73.6)            | --    | --                          | --                          | --    | --                          | --                          | --    | --                          | --                          |
|                               | API                | 136   | 94.0 (88.2-97.0)            | 76.1 (66.8-83.1)            | 137   | 95.5 (90.2-98.0)            | 74.0 (63.8-81.7)            | 104   | 91.2 (83.5-95.4)            | 60.7 (49.4-70.2)            | --    | --                          | --                          | --    | --                          | --                          | --    | --                          | --                          |
| Ependymoma                    | All groups         | 508   | 96.4 (94.3-97.7)            | 89.4 (86.0-92.0)            | 416   | 98.1 (96.1-99.1)            | 92.6 (89.0-95.1)            | 511   | 95.3 (92.9-96.9)            | 89.3 (85.6-92.1)            | 360   | 92.7 (89.2-95.1)            | 87.5 (82.4-91.2)            | 166   | 89.7 (83.2-93.7)            | 83.0 (74.5-88.9)            | 71    | 67.5 (54.0-77.9)            | 48.6 (31.5-63.7)            |
|                               | Non-Hispanic white | 303   | 96.0 (92.9-97.7)            | 90.8 (86.5-93.8)            | 266   | 98.6 (95.9-99.5)            | 92.1 (87.4-95.2)            | 366   | 95.6 (92.7-97.3)            | 89.5 (85.1-92.6)            | 274   | 92.6 (88.4-95.3)            | 87.5 (81.7-91.5)            | 124   | 93.2 (85.9-96.7)            | 86.1 (75.6-92.3)            | 62    | 67.3 (52.6-78.3)            | 50.2 (31.2-66.5)            |
|                               | Hispanic white     | 112   | 97.1 (91.1-99.1)            | 85.6 (76.1-91.6)            | 78    | 96.1 (87.9-98.8)            | 92.8 (82.2-97.2)            | 65    | 95.5 (85.6-98.7)            | 92.5 (79.5-97.4)            | --    | --                          | --                          | --    | --                          | --                          | --    | --                          | --                          |
|                               | Black              | 50    | 93.7 (81.7-98.0)            | 86.3 (70.9-93.9)            | --    | --                          | --                          | --    | --                          | --                          | --    | --                          | --                          | --    | --                          | --                          | --    | --                          | --                          |
|                               | API                | --    | --                          | --                          | --    | --                          | --                          | --    | --                          | --                          | --    | --                          | --                          | --    | --                          | --                          | --    | --                          | --                          |
| Other gliomas                 | All groups         | 268   | 92.5 (88.5-95.2)            | 76.5 (70.0-81.7)            | 178   | 87.4 (81.4-91.6)            | 61.0 (52.6-68.3)            | 244   | 74.0 (67.9-79.2)            | 44.2 (37.4-50.9)            | 218   | 56.8 (49.7-63.4)            | 25.1 (18.6-32.1)            | 183   | 42.2 (34.6-49.5)            | 11.5 (6.5-17.9)             | 156   | 21.1 (14.6-28.3)            | --                          |
|                               | Non-Hispanic white | 175   | 95.8 (91.4-98.0)            | 81.1 (73.3-86.8)            | 117   | 88.9 (81.5-93.5)            | 67.5 (57.4-75.6)            | 179   | 73.3 (65.9-79.2)            | 44.5 (36.6-52.1)            | 155   | 55.1 (46.7-62.7)            | 20.5 (13.7-28.3)            | 146   | 44.7 (36.1-52.9)            | 13.0 (7.5-20.2)             | 125   | 21.8 (14.5-30.1)            | --                          |
|                               | Hispanic white     | 50    | 84.1 (69.2-92.2)            | 64.8 (47.4-77.7)            | --    | --                          | --                          | --    | --                          | --                          | --    | --                          | --                          | --    | --                          | --                          | --    | --                          | --                          |
|                               | Black              | --    | --                          | --                          | --    | --                          | --                          | --    | --                          | --                          | --    | --                          | --                          | --    | --                          | --                          | --    | --                          | --                          |
|                               | API                | --    | --                          | --                          | --    | --                          | --                          | --    | --                          | --                          | --    | --                          | --                          | --    | --                          | --                          | --    | --                          | --                          |

Abbreviations: 95% CI: 95% confidence interval; API: Asian Pacific Islander

-- Rates are not presented for categories with 50 or less cases and were suppressed for rates where less than 16 cases were surviving within a category.

**eTable 6.** Hazard Ratios, P Values, Median Survival and 95% Confidence Intervals for Individuals That Received Resection by Race and Ethnicity, Adjusted by Age at Diagnosis and Extent of Resection (Subtotal vs Gross Total), 2000-2014

| Group                                              | Race/ethnicity     | N     | Deaths | Median survival in years (95% CI) | Race Hazard ratio (95% CI) | Race p-value         | GTR Hazard ratio | GTR p-value          | Age Hazard ratio (95% CI) | Age p-value          |
|----------------------------------------------------|--------------------|-------|--------|-----------------------------------|----------------------------|----------------------|------------------|----------------------|---------------------------|----------------------|
| Glioblastoma (all cases)                           | Non-Hispanic white | 9,637 | 8,711  | 0.92 (0.83-0.92)                  | 1                          | Ref                  | 0.71 (0.68-0.74) | <2x10 <sup>-16</sup> | 1.03 (1.03-1.04)          | <2x10 <sup>-16</sup> |
|                                                    | API                | 504   | 416    | 1.00 (1.00-1.17)                  | 0.81 (0.73-0.89)           | 2.4x10 <sup>-5</sup> |                  |                      |                           |                      |
|                                                    | Black              | 614   | 518    | 0.92 (0.83-1.00)                  | 0.97 (0.89-1.06)           | 0.57                 |                  |                      |                           |                      |
|                                                    | Hispanic white     | 1168  | 931    | 0.92 (0.83-1.00)                  | 0.92 (0.86-0.99)           | 0.02                 |                  |                      |                           |                      |
| Glioblastoma (received radiation and chemotherapy) | Non-Hispanic white | 5,534 | 4,920  | 1.17 (1.17-1.25)                  | 1                          | Ref                  | 0.74 (0.70-0.78) | <2x10 <sup>-16</sup> | 1.03 (1.03-1.03)          | <2x10 <sup>-16</sup> |
|                                                    | API                | 281   | 229    | 1.50 (1.33-1.67)                  | 0.77 (0.68-0.88)           | 1.4x10 <sup>-4</sup> |                  |                      |                           |                      |
|                                                    | Black              | 312   | 255    | 1.42 (1.25-1.50)                  | 0.84 (0.74-0.95)           | 0.008                |                  |                      |                           |                      |
|                                                    | Hispanic white     | 589   | 467    | 1.33 (1.25-1.42)                  | 0.89 (0.80-0.98)           | 0.013                |                  |                      |                           |                      |
| Non-glioblastoma astrocytoma                       | Non-Hispanic white | 2,384 | 1,172  | 8.25 (7.33-10.17)                 | 1                          | Ref                  | 0.60 (0.54-0.67) | <2x10 <sup>-16</sup> | 1.05 (1.05-1.05)          | <2x10 <sup>-16</sup> |
|                                                    | API                | 139   | 63     | 7.00 (4.92-**)                    | 1.03 (0.80-1.34)           | 0.780                |                  |                      |                           |                      |
|                                                    | Black              | 194   | 95     | 6.00 (5.17-9.17)                  | 1.18 (0.95-1.46)           | 0.120                |                  |                      |                           |                      |
|                                                    | Hispanic white     | 450   | 188    | 7.83 (6.25-11.00)                 | 1.00 (0.86-1.17)           | 0.990                |                  |                      |                           |                      |
| Oligodendroglial tumors                            | Non-Hispanic white | 2,029 | 807    | 13.25 (11.50-**)                  | 1                          | Ref                  | 0.72 (0.64-0.82) | 2.6x10 <sup>-7</sup> | 1.03 (1.03-1.04)          | <2x10 <sup>-16</sup> |
|                                                    | API                | 207   | 78     | 13.00 (9.67-**)                   | 1.10 (0.87-1.39)           | 0.410                |                  |                      |                           |                      |
|                                                    | Black              | 126   | 53     | 9.92 (8.08-**)                    | 1.21 (0.91-1.59)           | 0.190                |                  |                      |                           |                      |
|                                                    | Hispanic white     | 408   | 119    | **                                | 0.85 (0.70-1.03)           | 0.110                |                  |                      |                           |                      |

\*\* not able to be calculated

Abbreviations: 95% CI: 95% confidence interval; API: Asian Pacific Islander; GTR: Gross total resection

**eTable 7.** One- and Five-Year Relative Survival Rates and 95% Confidence Intervals (95% CI) for Selected Glioma Histologies in Adults (Ages 18+) by Race, Ethnicity, and Treatment Groups, SEER 18 Registries, 2005-2014

| Histologic group              | Race/ethnicity     | Received Any Radiation<br>(Diagnosis years 2005-2014) |                  |                  | Received Both Radiation & Chemotherapy<br>(Diagnosis years 2005-2014) |                  |                  |
|-------------------------------|--------------------|-------------------------------------------------------|------------------|------------------|-----------------------------------------------------------------------|------------------|------------------|
|                               |                    | N                                                     | 1- year survival | 5- year survival | N                                                                     | 1- year survival | 5- year survival |
|                               |                    |                                                       | % (95% CI)       | % (95% CI)       |                                                                       | % (95% CI)       | % (95% CI)       |
| Glioblastoma                  | All groups         | 16,302                                                | 54.4 (53.6-55.2) | 6.8 (6.3-7.4)    | 14,314                                                                | 58.2 (57.3-59.0) | 7.2 (6.7-7.8)    |
|                               | Non-Hispanic white | 12,937                                                | 53.6 (52.7-54.5) | 6.2 (5.7-6.8)    | 11,460                                                                | 57.2 (56.2-58.1) | 6.6 (6.0-7.2)    |
|                               | Hispanic white     | 1,564                                                 | 55.9 (53.2-58.5) | 9.6 (7.8-11.6)   | 1,311                                                                 | 60.4 (57.4-63.1) | 9.5 (7.6-11.8)   |
|                               | Black              | 940                                                   | 55.5 (52.1-58.7) | 8.6 (6.4-11.2)   | 793                                                                   | 60.9 (57.2-64.3) | 9.9 (7.4-13.0)   |
|                               | API                | 753                                                   | 63.1 (59.3-66.6) | 9.3 (6.6-12.5)   | 658                                                                   | 67.1 (63.1-70.7) | 10.1 (7.2-13.6)  |
| Non-glioblastoma astrocytomas | All groups         | 4,005                                                 | 75.2 (73.7-76.6) | 36.0 (34.1-37.8) | 2,953                                                                 | 76.0 (74.4-77.6) | 33.7 (31.6-35.8) |
|                               | Non-Hispanic white | 3,022                                                 | 73.7 (72.0-75.3) | 34.8 (32.8-36.9) | 2,285                                                                 | 74.6 (72.7-76.4) | 32.3 (30.0-34.7) |
|                               | Hispanic white     | 476                                                   | 81.2 (77.1-84.6) | 43.3 (37.6-48.8) | 326                                                                   | 82.9 (78.0-86.8) | 40.9 (34.1-47.7) |
|                               | Black              | 238                                                   | 74.8 (68.4-80.1) | 34.8 (27.5-42.3) | 147                                                                   | 73.7 (65.1-80.5) | 33.9 (24.8-43.3) |
|                               | API                | 225                                                   | 82.1 (75.9-86.9) | 39.5 (31.3-47.6) | 163                                                                   | 82.4 (74.9-87.8) | 40.9 (30.8-50.7) |
| Oligodendroglial tumors       | All groups         | 1,974                                                 | 90.3 (88.8-91.6) | 61.8 (59.1-64.3) | 1,372                                                                 | 89.4 (87.6-91.0) | 58.5 (55.3-61.6) |
|                               | Non-Hispanic white | 1,426                                                 | 89.3 (87.5-90.9) | 60.9 (57.8-63.9) | 1,022                                                                 | 88.5 (86.2-90.4) | 58.2 (54.5-61.8) |
|                               | Hispanic white     | 295                                                   | 94.1 (90.3-96.4) | 68.7 (61.6-74.7) | 171                                                                   | 94.1 (88.9-96.9) | 62.9 (53.1-71.2) |
|                               | Black              | 94                                                    | 88.9 (79.5-94.1) | 55.0 (42.0-66.2) | 57                                                                    | 89.1 (76.3-95.2) | 52.6 (36.0-66.8) |
|                               | API                | 141                                                   | 94.0 (88.1-97.0) | 59.9 (48.9-69.3) | 109                                                                   | 92.2 (84.7-96.1) | 56.6 (43.8-67.5) |
| Ependymoma                    | All groups         | 445                                                   | 95.0 (92.2-96.8) | 81.3 (76.3-85.4) | --                                                                    | --               | --               |
|                               | Non-Hispanic white | 295                                                   | 95.3 (91.8-97.3) | 81.3 (74.9-86.2) | --                                                                    | --               | --               |
|                               | Hispanic white     | 76                                                    | 91.7 (82.0-96.3) | 85.5 (73.2-92.4) | --                                                                    | --               | --               |
|                               | Black              | --                                                    | --               | --               | --                                                                    | --               | --               |
|                               | API                | --                                                    | --               | --               | --                                                                    | --               | --               |
| Other gliomas                 | All groups         | 375                                                   | 66.0 (60.6-70.8) | 24.9 (19.8-30.3) | 255                                                                   | 68.7 (62.2-74.3) | 21.2 (15.3-27.7) |
|                               | Non-Hispanic white | 277                                                   | 62.9 (56.6-68.6) | 23.9 (18.1-30.2) | 190                                                                   | 67.0 (59.4-73.5) | 21.9 (15.1-29.6) |
|                               | Hispanic white     | --                                                    | --               | --               | --                                                                    | --               | --               |
|                               | Black              | --                                                    | --               | --               | --                                                                    | --               | --               |
|                               | API                | --                                                    | --               | --               | --                                                                    | --               | --               |

Abbreviations: API: Asian Pacific Islander

-- Rates are not presented for categories with 50 or less cases and were suppressed for rates where less than 16 cases were surviving within a category.



**eTable 8.** One- and Five-Year Relative Survival Rates and 95% Confidence Intervals (95% CI) for Selected Glioma Histologies in Adults (Ages 18-64) by Race, Ethnicity, and Insurance Status, SEER 18 Registries, 2007-2014

| Histologic group              | Race/ethnicity     | Uninsured |                                |                                | Any Medicaid |                                |                                | Insured |                                |                                |
|-------------------------------|--------------------|-----------|--------------------------------|--------------------------------|--------------|--------------------------------|--------------------------------|---------|--------------------------------|--------------------------------|
|                               |                    | N         | 1- year survival<br>% (95% CI) | 5- year survival<br>% (95% CI) | N            | 1- year survival<br>% (95% CI) | 5- year survival<br>% (95% CI) | N       | 1- year survival<br>% (95% CI) | 5- year survival<br>% (95% CI) |
| Glioblastoma                  | All groups         | 619       | 51.7 (47.5-55.8)               | 6.4 (3.6-10.4)                 | 1,376        | 45.9 (43.1-48.6)               | 8.6 (6.7-10.8)                 | 6,926   | 61.6 (60.4-62.8)               | 7.9 (7.0-8.8)                  |
|                               | Non-Hispanic white | 372       | 48.5 (43.1-53.7)               | 5.4 (2.3-10.4)                 | 770          | 43.7 (40.0-47.4)               | 7.0 (4.7-9.8)                  | 5,603   | 61.2 (59.8-62.5)               | 7.4 (6.5-8.4)                  |
|                               | Hispanic white     | 123       | 58.1 (48.1-66.9)               | 9.1 (2.5-21.1)                 | 319          | 50.0 (43.8-55.7)               | 9.2 (5.2-14.7)                 | 572     | 60.9 (56.5-65.0)               | 11.2 (7.9-15.0)                |
|                               | Black              | 74        | 55.8 (43.1-66.6)               | 9.7 (3.2-20.6)                 | 175          | 44.6 (36.7-52.2)               | 10.6 (5.6-17.4)                | 375     | 59.5 (54.1-64.4)               | 9.4 (5.9-13.9)                 |
|                               | API                | --        | --                             | --                             | 81           | 55.1 (43.1-65.5)               | 18.0 (8.8-29.9)                | 338     | 71.2 (65.7-75.9)               | 8.7 (4.8-13.9)                 |
| Non-glioblastoma astrocytomas | All groups         | 315       | 81.1 (76.1-85.2)               | 57.0 (49.7-63.6)               | 687          | 82.4 (79.2-85.2)               | 53.0 (48.0-57.7)               | 2,839   | 86.6 (85.2-87.9)               | 55.8 (53.4-58.1)               |
|                               | Non-Hispanic white | 168       | 79.8 (72.6-85.3)               | 54.6 (44.8-63.4)               | 347          | 84.9 (80.4-88.4)               | 55.9 (48.9-62.4)               | 2,221   | 85.9 (84.3-87.3)               | 54.8 (52.2-57.4)               |
|                               | Hispanic white     | 77        | 87.5 (77.1-93.4)               | 67.4 (50.7-79.5)               | 182          | 81.0 (73.8-86.5)               | 47.8 (37.9-57.0)               | 276     | 87.2 (82.3-90.8)               | 64.8 (57.2-71.3)               |
|                               | Black              | --        | --                             | --                             | 91           | 78.7 (68.0-86.1)               | 50.0 (36.5-62.1)               | 121     | 92.2 (85.0-96.0)               | 45.9 (34.2-56.8)               |
|                               | API                | --        | --                             | --                             | --           | --                             | --                             | 186     | 89.9 (84.1-93.6)               | 58.6 (48.9-67.1)               |
| Oligodendroglial tumors       | All groups         | 217       | 92.5 (87.7-95.5)               | 76.8 (68.3-83.4)               | 421          | 92.2 (88.9-94.5)               | 73.5 (67.5-78.6)               | 1,953   | 95.1 (93.9-96.0)               | 79.1 (76.6-81.3)               |
|                               | Non-Hispanic white | 120       | 95.9 (89.8-98.4)               | 78.2 (66.5-86.3)               | 218          | 91.4 (86.5-94.6)               | 71.5 (63.1-78.3)               | 1,466   | 95.2 (93.9-96.2)               | 78.6 (75.8-81.2)               |
|                               | Hispanic white     | 62        | 90.3 (77.6-96.0)               | 71.7 (52.5-84.2)               | 135          | 91.7 (84.8-95.6)               | 78.8 (68.5-86.1)               | 226     | 95.2 (91.3-97.3)               | 82.8 (75.3-88.2)               |
|                               | Black              | --        | --                             | --                             | --           | --                             | --                             | 82      | 93.9 (85.0-97.6)               | 77.3 (64.6-86.0)               |
|                               | API                | --        | --                             | --                             | --           | --                             | --                             | 151     | 93.9 (88.4-96.8)               | 77.8 (67.3-85.3)               |

Abbreviations: 95% CI: 95% confidence interval; API: Asian Pacific Islander

**eTable 9.** Annual Percent Change (APC) and 95% Confidence Intervals by Glioma Histology and Race/Ethnicity, CBTRUS 2000-2014

| Histologic group                    | Race/ethnicity     | Trend 1   |                      | Trend 2   |                        |
|-------------------------------------|--------------------|-----------|----------------------|-----------|------------------------|
|                                     |                    | Years     | APC (95% CI)         | Years     | APC (95% CI)           |
| Glioblastoma                        | All groups         | 2000-2005 | 1.0 (0.1, 1.9) **    | 2005-2014 | -0.1 (-0.5, 0.2)       |
|                                     | Non-Hispanic white | 2000-2005 | 1.3 (0.4, 2.1) **    | 2005-2014 | 0.0 (-0.3, 0.4)        |
|                                     | Hispanic white     | 2000-2014 | -0.4 (-1.0, 0.1)     |           |                        |
|                                     | Black              | 2000-2014 | 1.0 (0.4, 1.6) **    |           |                        |
|                                     | API                | 2000-2014 | 1.0 (0.0, 2.1)       |           |                        |
| Non-glioblastoma astrocytomas       | All groups         | 2000-2014 | -1.4 (-1.6, -1.2) ** |           |                        |
|                                     | Non-Hispanic white | 2000-2014 | -1.0 (-1.3, -0.7) ** |           |                        |
|                                     | Hispanic white     | 2000-2014 | -2.2 (-3.2, -1.1) ** |           |                        |
|                                     | Black              | 2000-2014 | -1.2 (-1.9, -0.5) ** |           |                        |
|                                     | API                | 2000-2014 | -0.4 (-2.0, 1.3)     |           |                        |
| Oligodendroglial tumors             | All groups         | 2000-2014 | -2.0 (-2.4, -1.5) ** |           |                        |
|                                     | Non-Hispanic white | 2000-2014 | -1.6 (-2.2, -1.0) ** |           |                        |
|                                     | Hispanic white     | 2000-2014 | -2.8 (-3.9, -1.7) ** |           |                        |
|                                     | Black              | 2000-2014 | -1.3 (-2.5, -0.2) ** |           |                        |
|                                     | API                | 2000-2014 | -1.9 (-3.7, -0.1) ** |           |                        |
| <i>Oligodendroglioma</i>            | All groups         | 2000-2014 | -3.0 (-3.6, -2.4) ** |           |                        |
|                                     | Non-Hispanic white | 2000-2014 | -2.6 (-3.3, -1.9) ** |           |                        |
|                                     | Hispanic white     | 2000-2010 | -2.8 (-4.3, -1.2) ** | 2010-2014 | -10.1 (-16.2, -3.6) ** |
|                                     | Black              | 2000-2014 | -1.3 (-4.0, 1.4)     |           |                        |
|                                     | API                | 2000-2014 | -3.2 (-5.7, -0.6) ** |           |                        |
| <i>Anaplastic Oligodendroglioma</i> | All groups         | 2000-2009 | -5.5 (-6.4, -4.6) ** | 2009-2014 | 1.1 (-1.9, 4.3)        |
|                                     | Non-Hispanic white | 2000-2009 | -5.1 (-6.1, -4.1) ** | 2009-2014 | 1.0 (-2.2, 4.2)        |
|                                     | Hispanic white     | 2000-2014 | -2.3 (-4.7, 0.2)     |           |                        |
|                                     | Black              | --        | --                   |           |                        |
|                                     | API                | --        | --                   |           |                        |
| <i>Oligoastrocytic tumors</i>       | All groups         | 2000-2009 | 3.7 (1.0, 6.4) **    | 2009-2014 | -5.2 (-11.1, 1.0)      |
|                                     | Non-Hispanic white | 2000-2011 | 3.0 (1.4, 4.5) **    | 2011-2014 | -10.8 (-20.1, -0.4) ** |
|                                     | Hispanic white     | 2000-2006 | 8.0 (-1.6, 18.5)     | 2006-2014 | -5.5 (-10.0, -0.8) **  |
|                                     | Black              | --        | --                   |           |                        |
|                                     | API                | --        | --                   |           |                        |
| Ependymoma                          | All groups         | 2000-2009 | 2.8 (1.2, 4.4) **    | 2009-2014 | -4.6 (-8.2, -0.9) **   |
|                                     | Non-Hispanic white | 2000-2005 | 5.4 (1.4, 9.7) **    | 2005-2014 | -1.4 (-2.9, 0.1)       |
|                                     | Hispanic white     | 2000-2014 | -0.4 (-2.1, 1.3)     |           |                        |
|                                     | Black              | 2000-2009 | 7.0 (1.7, 12.5) **   | 2009-2014 | -7.6 (-16.4, 2.0)      |
|                                     | API                | --        | --                   |           |                        |

Abbreviations: 95% CI: 95% confidence interval; APC: Annual percentage change; API: Asian Pacific Islander

\*\* APC is statistically significant at the  $p < 0.05$  level

-- Not displayed due to low number of annual cases (<16 per year)

**eFigure.** Average Annual Age-Adjusted Incidence Rates and 95% Confidence Intervals for Selected Glioma Histologies by Race, Ethnicity, and Age at Diagnosis, 2000-2014

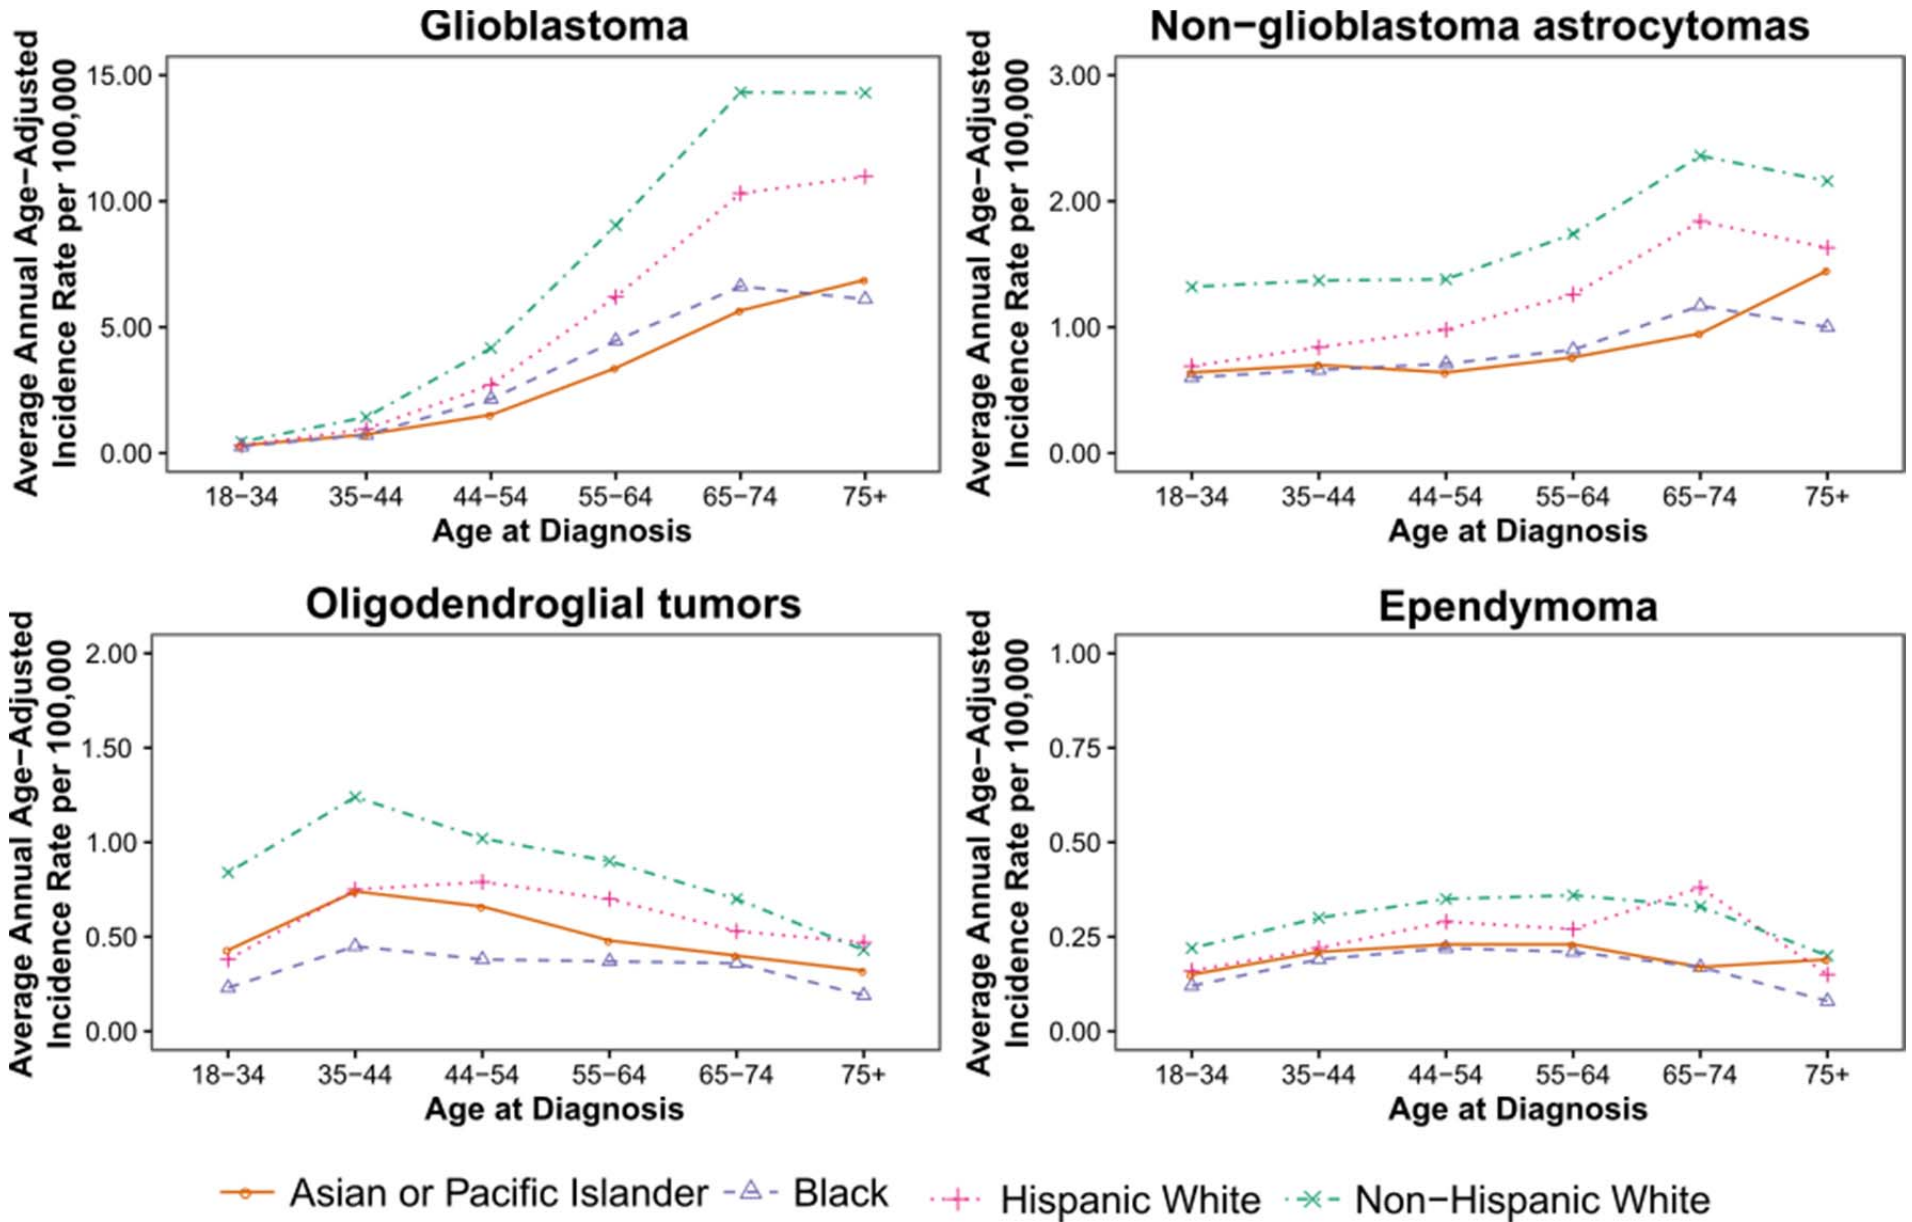

Supplement: jamaoncol-4-1254-s001.pdf [file jamaoncol-4-1254-s001.pdf]
